# Supplementary material for: The prognostic significance of protein arginine methyltransferase 6 expression in colon cancer
Source: PubMed Central journal article supplement (PMC5823663; doi:10.18632/oncotarget.23809), 2017-12-27
Supplement: oncotarget-09-9010-s001.pdf [file oncotarget-09-9010-s001.pdf]

## The prognostic significance of protein arginine methyltransferase 6 expression in colon cancer

### SUPPLEMENTARY MATERIALS

**A**

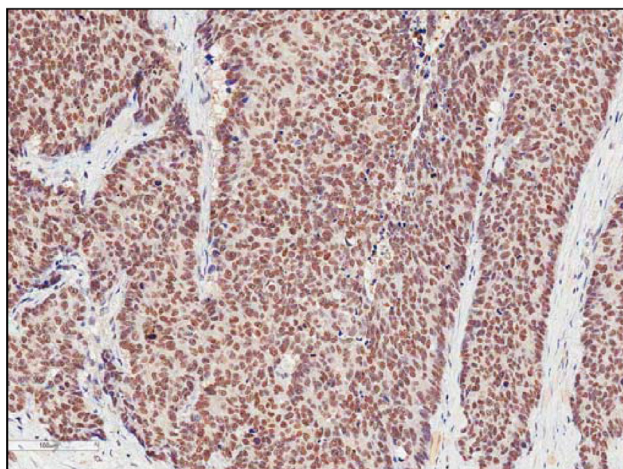

**B**

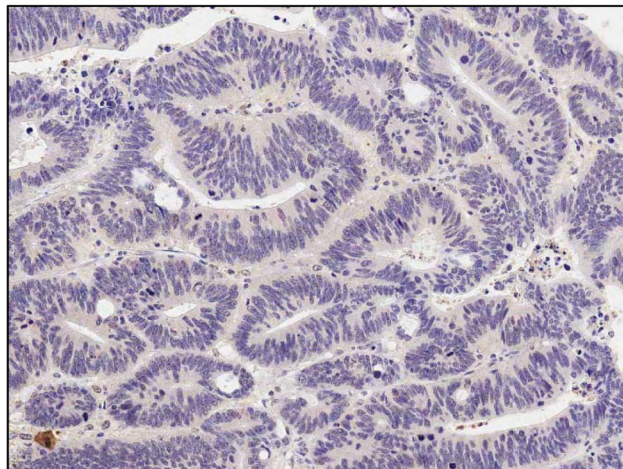

**Supplementary Figure 1: Immunohistochemical PRMT6 staining CRC images.** Images ( $\times 100$ ) of PRMT6 positive (A) and PRMT6-negative tumors (B) from stage III CRC patients.

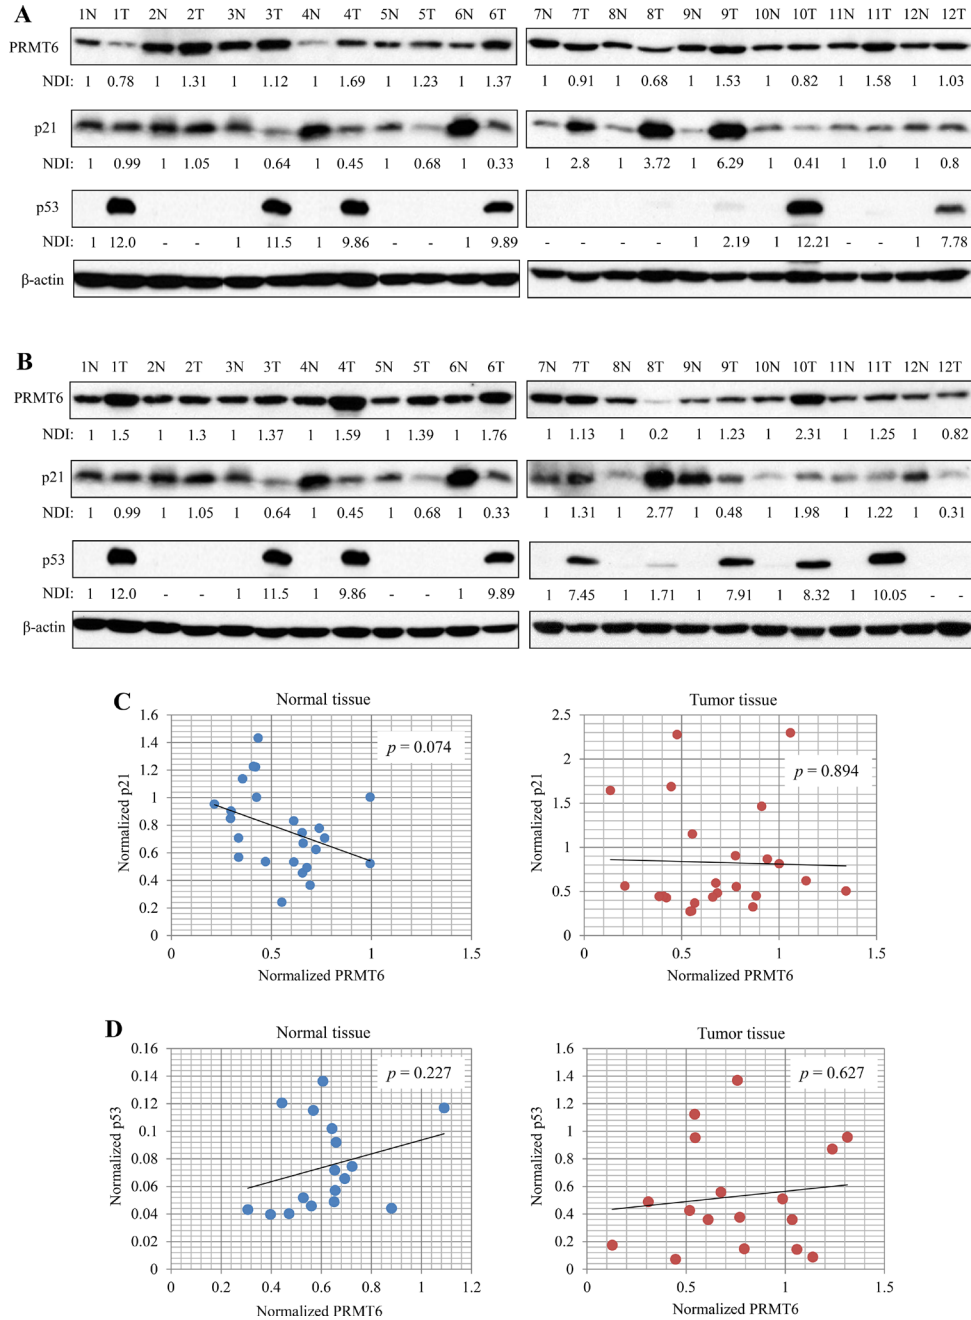

**Supplementary Figure 2: Interrelationship between PRMT6 and tumor suppressors in 24 matched samples from the primary CRC and adjacent normal tissues paired from the same patient.** Expressions of PRMT6, p21 and p53 in patients with stage II (A) and stage III (B) were examined by western blotting. Densitometric intensity of each protein was normalized to  $\beta$ -actin. NDI indicates normalized densitometric intensity. Densitometric values corresponding to each protein were plotted and interrelationships between PRMT6 and p21 (C) and p53 (D) analyzed.

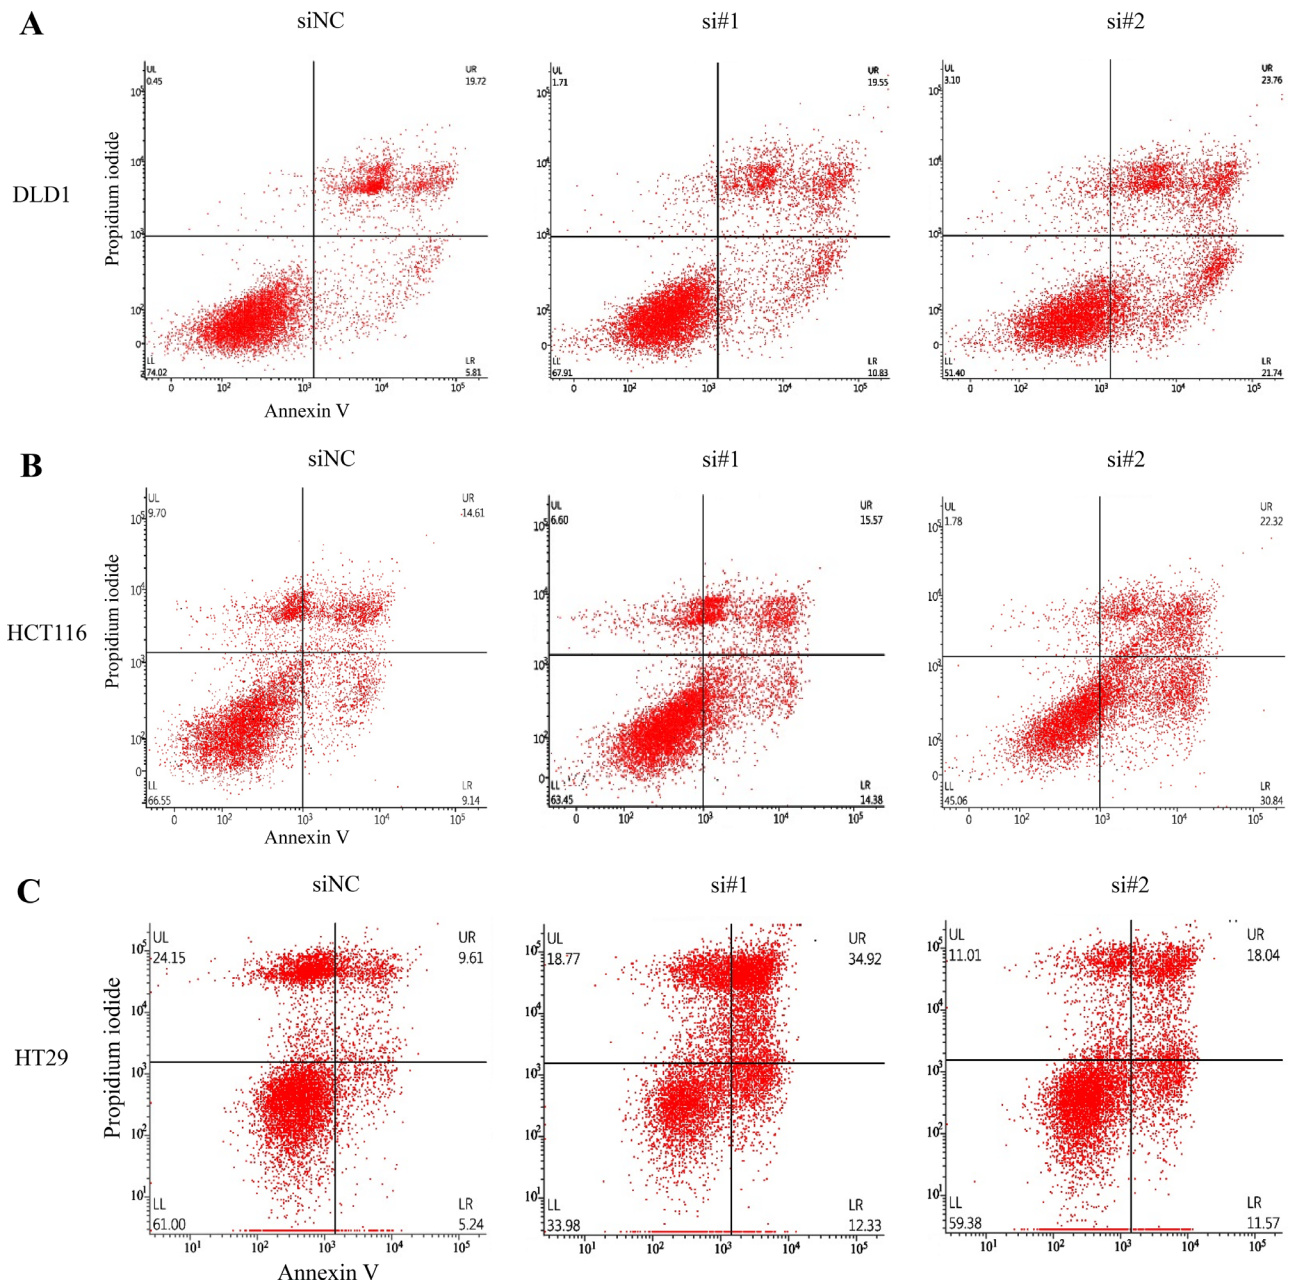

Supplementary Figure 3: Representative flow cytometry plots of siNC- and siPRMT6s-transfected CRC cells.

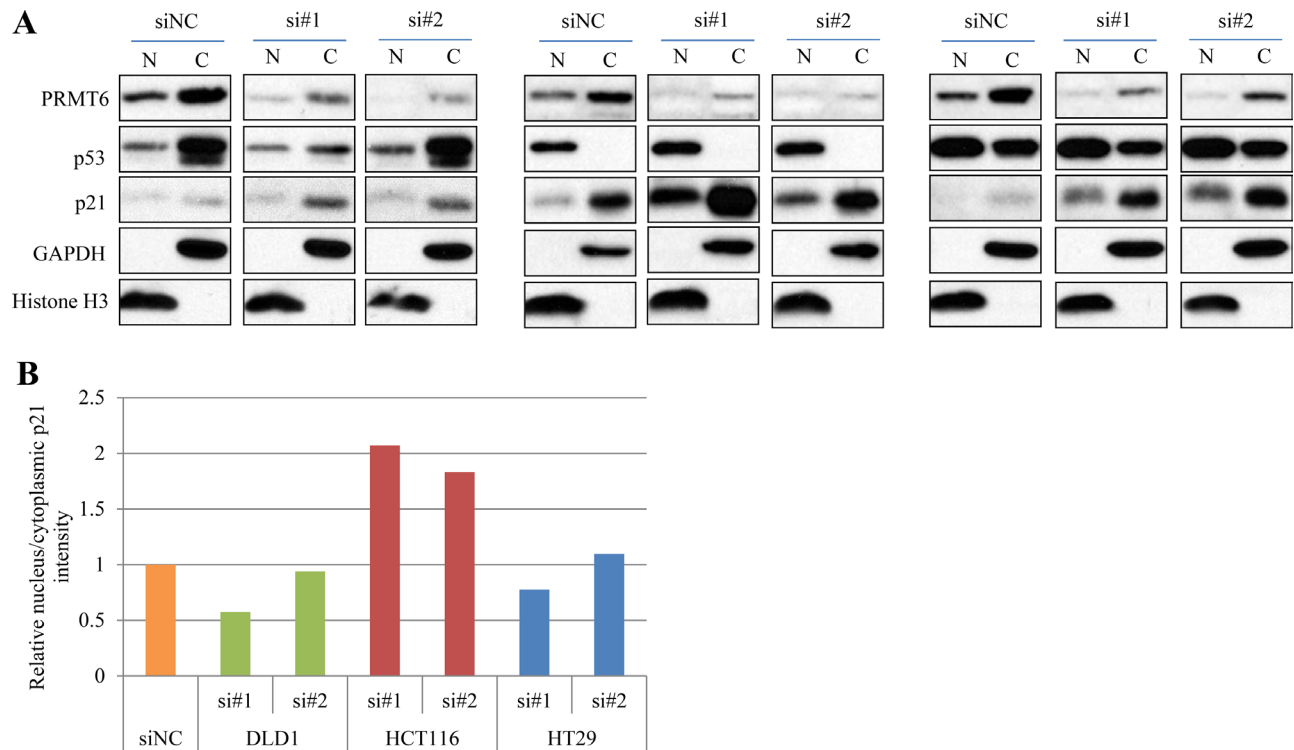

**Supplementary Figure 4: Nuclear and cytoplasmic fractions of DLD1, HCT116 and DLD1 cells were prepared and analyzed by western blot.** (A) The signal intensity of nuclear and cytoplasmic p21 was normalized by histone H3 signal and  $\beta$ -actin, respectively (B).

**Supplementary Table 1: Sequences of primers used in the real-time PCR**

| Gene Name | Primer sequence |                               |
|-----------|-----------------|-------------------------------|
| PRMT6     | Forward         | 5'-TGCTGCCACCTCGCCTTTTC-3'    |
|           | Reverse         | 5'-TTGGTCTTCTCCTCCTGGTCTCC-3' |
| p21       | Forward         | 5'-GGCAGACCAGCATGACAGATT-3'   |
|           | Reverse         | 5'-GCGGATTAGGGCTTCCTCTT-3'    |
| p53       | Forward         | 5'-AGACTGGGTCTCGCTTTGTTG-3'   |
|           | Reverse         | 5'-AGGCAAAGGCTGCAGTAAGC-3'    |
| GAPDH     | Forward         | 5'-ATCATCCCTGCCTCTACTGG-3'    |
|           | Reverse         | 5'-CTGCTTCACCACCTTCTTGA-3'    |

**Supplementary Table 2: Patients' demographics**

|                                  | <b>Number (%)</b><br><b>(Total N = 586)</b> |
|----------------------------------|---------------------------------------------|
| <b>Gender <i>n</i> (%)</b>       |                                             |
| Female                           | 221 (37.7)                                  |
| Male                             | 365 (62.3)                                  |
| <b>Median age (range, years)</b> | 59 (28–90)                                  |
| <b>Location</b>                  |                                             |
| Colon                            | 436 (74.4)                                  |
| Rectum                           | 150 (25.6)                                  |
| <b>Preoperative CEA (ng/ml)</b>  |                                             |
| Median (range)                   | 1.93 (0.14-148.32)                          |
| <b>AJCC stage</b>                |                                             |
| IIA                              | 269 (45.9)                                  |
| IIB                              | 29 (4.9)                                    |
| IIC                              | 10 (1.7)                                    |
| IIIA                             | 38 (6.5)                                    |
| IIIB                             | 240 (41.0)                                  |
| <b>Tumor stage</b>               |                                             |
| T1                               | 14 (2.4)                                    |
| T2                               | 26 (4.4)                                    |
| T3                               | 476 (81.2)                                  |
| T4                               | 70 (11.9)                                   |
| <b>Nodal stage</b>               |                                             |
| N0                               | 308 (52.6)                                  |
| N1                               | 216 (36.9)                                  |
| N2                               | 62 (10.6)                                   |
| <b>Cell type</b>                 |                                             |
| Well-differentiated              | 44 (7.5)                                    |
| Moderately-differentiated        | 488 (83.3)                                  |
| Poorly-differentiated            | 27 (4.6)                                    |
| Mucinous                         | 25 (4.3)                                    |
| Signet ring cell                 | 2 (0.3)                                     |
| <b>Lymphatic invasion</b>        |                                             |
| Negative                         | 430 (73.4)                                  |
| Positive                         | 156 (26.6)                                  |
| <b>Vascular invasion</b>         |                                             |
| Negative                         | 394 (67.2)                                  |
| Positive                         | 192 (32.8)                                  |
| <b>Perineural invasion</b>       |                                             |
| Negative                         | 411 (70.1)                                  |
| Positive                         | 175 (29.9)                                  |
| <b>Adjuvant chemotherapy</b>     |                                             |
| No                               | 45 (7.7)                                    |
| Yes                              | 458 (78.2)                                  |
| Undescribed                      | 83 (14.2)                                   |
| <b>PRMT6 expression</b>          |                                             |
| Negative                         | 447 (76.3)                                  |
| Positive                         | 139 (23.7)                                  |

**Supplementary Table 3: Univariate and multivariate analyses for prognostic variables of disease-free and overall survival using Cox-proportional-hazards regression**

**(1) Disease-free survival**

| Predictors                   | Univariate             | <i>p</i> -value | Multivariate           | <i>p</i> -value |
|------------------------------|------------------------|-----------------|------------------------|-----------------|
|                              | Ratio of risk (95% CI) |                 | Ratio of risk (95% CI) |                 |
| <b>Gender</b>                |                        | 0.862           |                        |                 |
| Female                       | 1.000                  |                 |                        |                 |
| Male                         | 1.039 (0.672–1.607)    |                 |                        |                 |
| <b>Age (years)</b>           |                        | 0.107           |                        |                 |
| < 60                         | 1.000                  |                 |                        |                 |
| ≥ 60                         | 0.697 (0.449–1.081)    |                 |                        |                 |
| <b>Location</b>              |                        | < 0.001         |                        | 0.006           |
| Colon                        | 1.000                  |                 | 1.000                  |                 |
| Rectum                       | 2.175 (1.420–3.333)    |                 | 1.851 (1.196–2.865)    |                 |
| <b>CEA level</b>             |                        | 0.001           |                        | 0.076           |
| ≤ 5 ng/ml                    | 1.000                  |                 | 1.000                  |                 |
| > 5 ng/ml                    | 2.105 (1.330–3.332)    |                 | 1.548 (0.956–2.505)    |                 |
| <b>T stage</b>               |                        | 0.174           |                        |                 |
| T1–2                         | 1.000                  |                 |                        |                 |
| T3–4                         | 2.223 (0.703–7.033)    |                 |                        |                 |
| <b>N stage</b>               |                        | 0.003           |                        | 0.155           |
| N0                           | 1.000                  |                 | 1.000                  |                 |
| N+                           | 1.944 (1.257–3.005)    |                 | 1.448 (0.870–2.410)    |                 |
| <b>Cell type</b>             |                        | 0.689           |                        |                 |
| WD/MD                        | 1.000                  |                 |                        |                 |
| PD/MUC/SRC                   | 0.854 (0.394–1.849)    |                 |                        |                 |
| <b>Lymphatic invasion</b>    |                        | < 0.001         |                        | 0.094           |
| Negative                     | 1.000                  |                 | 1.000                  |                 |
| Positive                     | 2.448 (1.604–3.735)    |                 | 1.526 (0.930–2.503)    |                 |
| <b>Vascular invasion</b>     |                        | < 0.001         |                        | 0.003           |
| Negative                     | 1.000                  |                 | 1.000                  |                 |
| Positive                     | 3.334 (2.126–5.229)    |                 | 2.216 (1.318–3.725)    |                 |
| <b>Perineural invasion</b>   |                        | 0.010           |                        | 0.195           |
| Negative                     | 1.000                  |                 | 1.000                  |                 |
| Positive                     | 2.223 (1.208–4.088)    |                 | 1.527 (0.805–2.897)    |                 |
| <b>Adjuvant chemotherapy</b> |                        | 0.001           |                        | < 0.001         |
| Yes                          | 1.000                  |                 | 1.000                  |                 |
| No/undescribed               | 2.133 (1.359–3.349)    |                 | 2.557 (1.602–4.080)    |                 |
| <b>PRMT6 expression</b>      |                        | 0.018           |                        | 0.035           |
| Negative                     | 1.000                  |                 | 1.000                  |                 |
| Positive                     | 1.711 (1.096–2.673)    |                 | 1.630 (1.034–2.569)    |                 |

**(2) Overall survival**

| Predictors                   | Univariate             | <i>p</i> -value | Multivariate           | <i>p</i> -value |
|------------------------------|------------------------|-----------------|------------------------|-----------------|
|                              | Ratio of risk (95% CI) |                 | Ratio of risk (95% CI) |                 |
| <b>Gender</b>                |                        | 0.441           |                        |                 |
| Female                       | 1.000                  |                 |                        |                 |
| Male                         | 1.295 (0.671–2.500)    |                 |                        |                 |
| <b>Age (years)</b>           |                        | <u>0.014</u>    |                        | 0.219           |
| ≤ 60                         | 1.000                  |                 | 1.000                  |                 |
| > 60                         | 2.191 (1.169–4.105)    |                 | 1.509 (0.783–2.910)    |                 |
| <b>Location</b>              |                        | 0.124           |                        |                 |
| Colon                        | 1.000                  |                 |                        |                 |
| Rectum                       | 1.646 (0.872–3.107)    |                 |                        |                 |
| <b>CEA level</b>             |                        | <u>≤ 0.001</u>  |                        | <u>0.003</u>    |
| ≤ 5 ng/ml                    | 1.000                  |                 | 1.000                  |                 |
| > 5 ng/ml                    | 3.482 (1.870–6.483)    |                 | 2.654 (1.384–5.089)    |                 |
| <b>T stage</b>               |                        | 0.241           |                        |                 |
| T1–2                         | 1.000                  |                 |                        |                 |
| T3–4                         | 3.280 (0.451–23.863)   |                 |                        |                 |
| <b>N stage</b>               |                        | <u>0.014</u>    |                        | 0.282           |
| N0                           | 1.000                  |                 | 1.000                  |                 |
| N+                           | 2.273 (1.177–4.388)    |                 | 1.519 (0.710–3.254)    |                 |
| <b>Cell type</b>             |                        | 0.925           |                        |                 |
| WD/MD                        | 1.000                  |                 |                        |                 |
| PD/Muc/SRC                   | 1.051 (0.374–2.947)    |                 |                        |                 |
| <b>Lymphatic invasion</b>    |                        | <u>≤ 0.001</u>  |                        | <u>0.013</u>    |
| Negative                     | 1.000                  |                 | 1.000                  |                 |
| Positive                     | 3.732 (2.014–6.915)    |                 | 2.389 (1.200–4.759)    |                 |
| <b>Vascular invasion</b>     |                        | <u>≤ 0.001</u>  |                        | 0.079           |
| Negative                     | 1.000                  |                 | 1.000                  |                 |
| Positive                     | 3.230 (1.694–6.160)    |                 | 1.895 (0.928–3.870)    |                 |
| <b>Perineural invasion</b>   |                        | <u>0.001</u>    |                        | <u>0.012</u>    |
| Negative                     | 1.000                  |                 | 1.000                  |                 |
| Positive                     | 3.676 (1.755–7.703)    |                 | 2.694 (1.247–5.819)    |                 |
| <b>Adjuvant chemotherapy</b> |                        | <u>≤ 0.001</u>  |                        | <u>≤ 0.001</u>  |
| Yes                          | 1.000                  |                 | 1.000                  |                 |
| No/undescribed               | 5.662 (3.061–10.476)   |                 | 5.615 (2.914–10.819)   |                 |
| <b>PRMT6 expression</b>      |                        | 0.353           |                        |                 |
| Negative                     | 1.000                  |                 |                        |                 |
| Positive                     | 1.376 (0.702–2.696)    |                 |                        |                 |
